# Supplementary material
Source: publisher figshare collection journal article supplement (https://gsapubs.figshare.com/ndownloader/files/36380181)
Supplement: Supplementary file 1 [file 36380181]

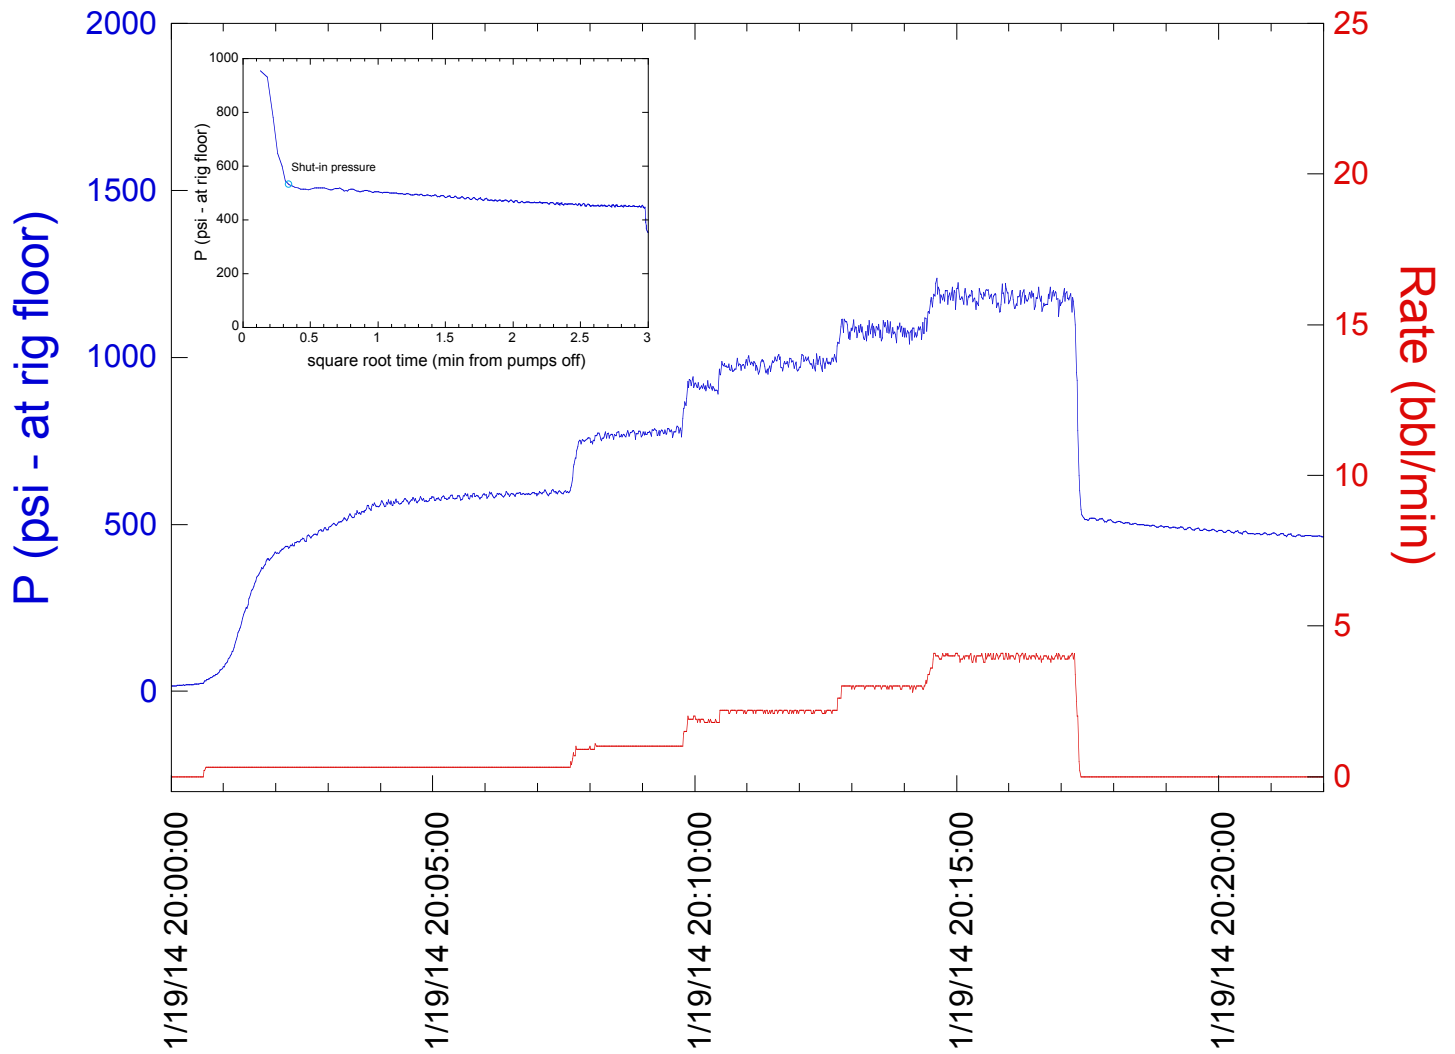

Figure S1: Stepped rate injection test (SRIT) record, showing pumping rate (red curve) and pressure measured at the rig floor (blue). Leak-off pressure (LOP) during initial injection is consistent with the interpreted shut-in pressure after pumps were turned off.
